# Supplementary material for: Microparticle traction force microscopy reveals subcellular force exertion patterns in immune cell–target interactions
Source: PubMed Central journal article supplement (PMC6946705; doi:10.1038/s41467-019-13804-z), 2020-01-07
Supplement: 41467_2019_13804_MOESM3_ESM.pdf [file 41467_2019_13804_MOESM3_ESM.pdf]

## **Description of Additional Supplementary Files**

File Name: Supplementary Movie 1

Description: Shape, mean curvature, surface accessibility, and normal and shear traction force magnitude for particle 1 (9 % engulfed).

File Name: Supplementary Movie 2

Description: Shape, mean curvature, surface accessibility, and normal and shear traction force magnitude for particle 2 (34 % engulfed).

File Name: Supplementary Movie 3

Description: Shape, mean curvature, surface accessibility, and normal and shear traction force magnitude for particle 3 (84 % engulfed).

File Name: Supplementary Movie 4

Description: Shape, mean curvature, surface accessibility, and normal and shear traction force magnitude for particle 4 (100 % engulfed).
